# Supplementary material for: Centrosymmetric K2SO4·(SbF3)2and noncentrosymmetric Rb2SO4·(SbF3)2resulting from cooperative effects of lone pair and cation size
Source: Royal Society of Chemistry journal article supplement (doi:10.1039/c9qi01036j), 2019-01-01
Supplement: c9qi01036j1.pdf [file c9qi01036j1.pdf]

Electronic Supplementary Information (ESI) for:

**Centrosymmetric  $\text{K}_2\text{SO}_4 \cdot (\text{SbF}_3)_2$  and Noncentrosymmetric  $\text{Rb}_2\text{SO}_4 \cdot (\text{SbF}_3)_2$  Resulting from Cooperative Effects of Lone Pair and Cation Size**

Qian Wang <sup>a</sup>, Lei Wang <sup>a</sup>, Xiaoyu Zhao <sup>b</sup>, Ling Huang<sup>a\*</sup>, Daojiang Gao <sup>a</sup>, Jian Bi <sup>a</sup>, Xin Wang <sup>b\*</sup> and Guohong Zou <sup>b\*</sup>

<sup>a</sup> College of Chemistry and Materials Science, Sichuan Normal University, Chengdu, 610068, P. R. China.

<sup>b</sup> College of Chemistry, Sichuan University, Chengdu, 610064, P. R. China.

E-mail: huangl026@sina.com; wangxin@scu.edu.cn; zough@scu.edu.cn

## Table of Contents

|                                                                                                                                                         |    |
|---------------------------------------------------------------------------------------------------------------------------------------------------------|----|
| <b>Table S1.</b> Atomic coordinates, equivalent isotropic displacement parameters, and calculated Bond Valence Sum for $K_2SO_4 \cdot (SbF_3)_2$ .....  | S3 |
| <b>Table S2.</b> Atomic coordinates, equivalent isotropic displacement parameters, and calculated Bond Valence Sum for $Rb_2SO_4 \cdot (SbF_3)_2$ ..... | S4 |
| <b>Table S3.</b> Selected Bond lengths (Å) and angles (deg) for $K_2SO_4 \cdot (SbF_3)_2$ .....                                                         | S5 |
| <b>Table S4.</b> Selected Bond lengths (Å) and angles (deg) for $Rb_2SO_4 \cdot (SbF_3)_2$ .....                                                        | S6 |
| <b>Fig. S1.</b> Crystal photographs of compounds (a) $K_2SO_4 \cdot (SbF_3)_2$ and (b) $Rb_2SO_4 \cdot (SbF_3)_2$ .....                                 | S8 |
| <b>Fig. S2.</b> TGA curves of compounds (a) $K_2SO_4 \cdot (SbF_3)_2$ and (b) $Rb_2SO_4 \cdot (SbF_3)_2$ .....                                          | S8 |
| <b>Fig. S3.</b> Experimental XRD patterns for compounds (a) $K_2SO_4 \cdot (SbF_3)_2$ and (b) $Rb_2SO_4 \cdot (SbF_3)_2$ before and after melting ..... | S8 |
| <b>Fig. S4.</b> The IR spectra of compounds (a) $K_2SO_4 \cdot (SbF_3)_2$ and (b) $Rb_2SO_4 \cdot (SbF_3)_2$ .....                                      | S9 |
| <b>Fig. S5.</b> Calculated band structures of (a) $K_2SO_4 \cdot (SbF_3)_2$ and (b) $Rb_2SO_4 \cdot (SbF_3)_2$ .....                                    | S9 |

**Table S1.** Atomic coordinates and equivalent isotropic displacement parameters ( $\text{\AA}^2$ ), and calculated Bond Valence Sum for  $\text{K}_2\text{SO}_4 \cdot (\text{SbF}_3)_2$ .  $U(eq)$  is defined as one third of the trace of the orthogonalized  $U_{ij}$  tensor.

| Atom | x            | y            | z            | U(eq)        | BVS  |
|------|--------------|--------------|--------------|--------------|------|
| Sb1  | 0.82363 (3)  | 0.26103 (4)  | 0.72136 (2)  | 0.00819 (11) | 2.87 |
| Sb2  | 0.31451 (3)  | 0.78202 (5)  | 0.50037 (2)  | 0.00918 (11) | 2.95 |
| K1   | 0.63949 (11) | 0.74910 (13) | 0.82655 (5)  | 0.0126 (2)   | 1.01 |
| K2   | 1.01873 (11) | 0.24770 (14) | 0.92575 (5)  | 0.0135 (2)   | 0.93 |
| S1   | 0.63048 (11) | 0.73935 (15) | 0.62219 (5)  | 0.0085 (2)   | 5.97 |
| F1   | 0.8624 (3)   | 0.4739 (4)   | 0.80384 (11) | 0.0165 (5)   | 1.09 |
| F2   | 0.9294 (3)   | 0.0301 (4)   | 0.79144 (12) | 0.0186 (5)   | 0.91 |
| F3   | 0.6470 (2)   | 0.1549 (4)   | 0.75095 (12) | 0.0149 (5)   | 1.13 |
| F4   | 0.2645 (2)   | 0.5580 (4)   | 0.56661 (11) | 0.0147 (5)   | 1.14 |
| F5   | 0.1080 (3)   | 0.7131 (4)   | 0.44596 (13) | 0.0180 (5)   | 0.90 |
| F6   | 0.2082 (2)   | 1.0234 (4)   | 0.54291 (12) | 0.0148 (5)   | 1.12 |
| O1   | 0.7634 (3)   | 0.8914 (6)   | 0.64463 (15) | 0.0206 (7)   | 1.88 |
| O2   | 0.4936 (3)   | 0.8891 (5)   | 0.60789 (13) | 0.0121 (5)   | 1.90 |
| O3   | 0.6391 (3)   | 0.6206 (6)   | 0.55520 (14) | 0.0225 (7)   | 1.76 |
| O4   | 0.6236 (3)   | 0.5680 (6)   | 0.67873 (16) | 0.0237 (7)   | 1.89 |

**Table S2.** Atomic coordinates and equivalent isotropic displacement parameters ( $\text{\AA}^2$ ), and calculated Bond Valence Sum for  $\text{Rb}_2\text{SO}_4 \cdot (\text{SbF}_3)_2$ .  $U(eq)$  is defined as one third of the trace of the orthogonalized  $U_{ij}$  tensor.

| Atom | x           | y            | z           | U(eq)        | BVS  |
|------|-------------|--------------|-------------|--------------|------|
| Sb1  | 0.17363 (6) | 0.5010 (5)   | 0.55869 (6) | 0.00731 (14) | 2.99 |
| Sb2  | 0.31898 (7) | 0.5032 (4)   | 0.99959 (6) | 0.02175 (19) | 3.06 |
| Rb1  | 0.02396 (9) | 0.9986 (7)   | 0.85431 (9) | 0.01102 (19) | 1.12 |
| Rb2  | 0.35956 (9) | 0.0020 (6)   | 0.34806 (9) | 0.01104 (18) | 1.26 |
| S1   | 0.3706 (2)  | -0.0018 (15) | 0.7562 (2)  | 0.0118 (5)   | 5.97 |
| F1   | 0.2525 (12) | 0.2838 (11)  | 1.1222 (10) | 0.034 (3)*   | 1.24 |
| F2   | 0.2244 (10) | 0.7570 (16)  | 1.0886 (9)  | 0.021 (2)*   | 1.14 |
| F3   | 0.1159 (6)  | 0.501 (3)    | 0.8857 (6)  | 0.0162 (11)* | 1.11 |
| F4   | 0.1300 (10) | 0.7163 (15)  | 0.4003 (9)  | 0.0203 (17)* | 1.16 |
| F5   | 0.0734 (10) | 0.2715 (15)  | 0.4201 (8)  | 0.0201 (17)* | 1.00 |
| F6   | 0.3456 (8)  | 0.4126 (15)  | 0.4977 (9)  | 0.0233 (18)  | 1.27 |
| O1   | 0.2453 (10) | 0.1428 (18)  | 0.7095 (10) | 0.020 (2)    | 2.12 |
| O2   | 0.5121 (10) | 0.1092 (15)  | 0.7865 (9)  | 0.0129 (17)* | 2.10 |
| O3   | 0.3556 (11) | -0.1376 (19) | 0.8843 (11) | 0.025 (2)    | 1.72 |
| O4   | 0.3721 (12) | -0.1924 (19) | 0.6474 (11) | 0.026 (2)    | 1.65 |

**Table S3.** Selected Bond lengths (Å) and angles (deg) for  $\text{K}_2\text{SO}_4 \cdot (\text{SbF}_3)_2$ .

|                                       |             |                                        |             |
|---------------------------------------|-------------|----------------------------------------|-------------|
| Sb1—F3                                | 1.935 (2)   | K2—O1 <sup>viii</sup>                  | 2.783 (3)   |
| Sb1—F1                                | 1.958 (2)   | K2—F2                                  | 2.809 (2)   |
| Sb1—F2                                | 1.967 (2)   | K2—F6 <sup>ix</sup>                    | 2.827 (2)   |
| Sb1—O4                                | 2.525 (3)   | K2—F4 <sup>ii</sup>                    | 2.852 (2)   |
| Sb1—O1 <sup>i</sup>                   | 2.545 (3)   | K2—F5 <sup>ii</sup>                    | 2.966 (3)   |
| Sb1—K1 <sup>i</sup>                   | 4.1111 (9)  | K2—F5 <sup>ix</sup>                    | 3.157 (3)   |
| Sb1—K1                                | 4.0173 (9)  | K2—O3 <sup>viii</sup>                  | 3.167 (3)   |
| Sb1—K1 <sup>ii</sup>                  | 4.1472 (10) | O1—K2 <sup>x</sup>                     | 2.783 (3)   |
| Sb2—F4                                | 1.925 (2)   | S1—O4                                  | 1.468 (3)   |
| Sb2—F6                                | 1.963 (2)   | S1—O3                                  | 1.471 (3)   |
| Sb2—F5                                | 1.987 (2)   | S1—O1                                  | 1.476 (3)   |
| Sb2—O2                                | 2.408 (3)   | S1—O2                                  | 1.490 (3)   |
| K1—F1                                 | 2.687 (2)   | F3—K1 <sup>ii</sup>                    | 2.766 (2)   |
| K1—F4 <sup>iii</sup>                  | 2.687 (2)   | F4—K1 <sup>ii</sup>                    | 2.687 (2)   |
| K1—F3 <sup>vi</sup>                   | 2.725 (2)   | F4—K2 <sup>iii</sup>                   | 2.852 (2)   |
| K1—F3 <sup>iii</sup>                  | 2.766 (2)   | F5—K2 <sup>v</sup>                     | 2.732 (3)   |
| K1—O2 <sup>ii</sup>                   | 2.817 (3)   | F5—K2 <sup>iii</sup>                   | 2.966 (3)   |
| K1—F6 <sup>ii</sup>                   | 2.879 (2)   | F5—K2 <sup>iv</sup>                    | 3.157 (3)   |
| K1—O4                                 | 2.994 (3)   | F6—K2 <sup>iii</sup>                   | 2.779 (2)   |
| K1—O4 <sup>iii</sup>                  | 3.000 (3)   | F6—K2 <sup>iv</sup>                    | 2.827 (2)   |
| K2—F1                                 | 2.768 (2)   | O3—K2 <sup>x</sup>                     | 3.167 (3)   |
| K2—F6 <sup>ii</sup>                   | 2.779 (2)   | O4—K1 <sup>ii</sup>                    | 3.000 (3)   |
| S1—O3—K2 <sup>x</sup>                 | 92.63 (13)  | Sb2—F6—K2 <sup>iv</sup>                | 105.11 (9)  |
| S1—O4—Sb1                             | 122.84 (16) | K2 <sup>iii</sup> —F6—K2 <sup>iv</sup> | 94.19 (7)   |
| S1—O4—K1 <sup>ii</sup>                | 122.82 (16) | S1—O1—Sb1 <sup>vi</sup>                | 134.71 (16) |
| Sb1—O4—K1 <sup>ii</sup>               | 96.90 (10)  | S1—O1—K2 <sup>x</sup>                  | 109.16 (15) |
| K1—O4—K1 <sup>ii</sup>                | 95.83 (8)   | Sb1 <sup>vi</sup> —O1—K2 <sup>x</sup>  | 115.86 (10) |
| O2 <sup>ii</sup> —K1—F6 <sup>ii</sup> | 57.59 (7)   | O4—S1—O3                               | 111.58 (19) |

|                          |             |                         |             |
|--------------------------|-------------|-------------------------|-------------|
| F1—K1—O4                 | 61.39 (7)   | O4—S1—O1                | 109.90 (18) |
| F4 <sup>iii</sup> —K1—O4 | 152.20 (8)  | O3—S1—O1                | 108.37 (18) |
| F3 <sup>vi</sup> —K1—O4  | 77.45 (8)   | O4—S1—O2                | 109.52 (16) |
| F3 <sup>iii</sup> —K1—O4 | 65.71 (7)   | O3—S1—O2                | 108.05 (16) |
| O2 <sup>ii</sup> —K1—O4  | 104.26 (8)  | O1—S1—O2                | 109.38 (17) |
| F6 <sup>ii</sup> —K1—O4  | 125.82 (8)  | O4—S1—K2 <sup>x</sup>   | 113.34 (12) |
| S1—O4—K1                 | 118.48 (18) | S1—O2—Sb2               | 113.52 (14) |
| Sb1—O4—K1                | 93.02 (9)   | S1—O2—K1 <sup>iii</sup> | 139.75 (15) |

Symmetry codes: (i)  $x, y-1, z$ ; (ii)  $-x+1, y-1/2, -z+3/2$ ; (iii)  $-x+1, y+1/2, -z+3/2$ ; (iv)  $x-1, -y+3/2, z-1/2$ ; (v)  $x-1, -y+1/2, z-1/2$ ; (vi)  $x, y+1, z$ ; (vii)  $x+1, -y+1/2, z+1/2$ ; (viii)  $-x+2, y-1/2, -z+3/2$ ; (ix)  $x+1, -y+3/2, z+1/2$ ; (x)  $-x+2, y+1/2, -z+3/2$ .

**Table S4.** Selected Bond lengths (Å) and angles (deg) for  $\text{Rb}_2\text{SO}_4 \cdot (\text{SbF}_3)_2$ .

|                       |             |                        |            |
|-----------------------|-------------|------------------------|------------|
| Sb1—F6                | 1.923 (8)   | Rb1—F5 <sup>x</sup>    | 2.947 (8)  |
| Sb1—F4                | 1.957 (8)   | Rb1—F2                 | 2.955 (10) |
| Sb1—F5                | 1.966 (8)   | Rb1—F3                 | 2.969 (17) |
| Sb1—O1                | 2.528 (9)   | Rb1—F3 <sup>i</sup>    | 2.996 (17) |
| Sb1—O4 <sup>i</sup>   | 2.558 (11)  | Rb1—F3 <sup>xi</sup>   | 3.153 (5)  |
| Sb1—Rb1 <sup>ii</sup> | 4.0584 (11) | Rb1—O3 <sup>i</sup>    | 3.160 (11) |
| Sb2—F1                | 1.9482 (10) | S1—O2                  | 1.440 (10) |
| Sb2—F3                | 1.971 (6)   | S1—O3                  | 1.520 (10) |
| Sb2—F2                | 2.012 (8)   | S1—O4                  | 1.534 (11) |
| Sb2—O2 <sup>iv</sup>  | 2.398 (9)   | S1—O1                  | 1.423 (10) |
| Sb2—O3 <sup>i</sup>   | 2.414 (10)  | Rb2—F4 <sup>vi</sup>   | 2.852 (9)  |
| Rb2—F5                | 3.323 (9)   | Rb2—F6 <sup>viii</sup> | 2.872 (8)  |
| Rb1—F2 <sup>xi</sup>  | 2.931 (9)   | Rb2—F2 <sup>ix</sup>   | 2.931 (9)  |
| Rb1—F1 <sup>xi</sup>  | 2.935 (11)  | Rb2—O2 <sup>viii</sup> | 3.007 (9)  |
| O4—Sb1 <sup>vi</sup>  | 2.558 (10)  | O2—Sb2 <sup>xiv</sup>  | 2.398 (9)  |
| O2—Rb2 <sup>iii</sup> | 3.007 (9)   |                        |            |

|                                           |           |                                       |            |
|-------------------------------------------|-----------|---------------------------------------|------------|
| F6—Sb1—F4                                 | 86.9 (4)  | F5—Rb2—Sb1 <sup>vi</sup>              | 75.76 (15) |
| F6—Sb1—F5                                 | 84.6 (3)  | S1—Rb2—Sb1 <sup>vi</sup>              | 53.60 (10) |
| F4—Sb1—F5                                 | 83.7 (3)  | Sb1—Rb2—Sb1 <sup>vi</sup>             | 86.86 (2)  |
| F6—Sb1—O1                                 | 81.1 (3)  | F4 <sup>x</sup> —Rb1—O1 <sup>i</sup>  | 73.5 (3)   |
| F4—Sb1—O1                                 | 163.1 (3) | F4 <sup>x</sup> —Rb1—F2 <sup>xi</sup> | 72.0 (2)   |
| F5—Sb1—O1                                 | 83.4 (3)  | O1 <sup>i</sup> —Rb1—F2 <sup>xi</sup> | 130.4 (3)  |
| F6—Sb1—O4 <sup>i</sup>                    | 71.8 (3)  | F4 <sup>x</sup> —Rb1—F1 <sup>xi</sup> | 88.9 (3)   |
| F4—Sb1—O4 <sup>i</sup>                    | 80.7 (4)  | O1 <sup>i</sup> —Rb1—F1 <sup>xi</sup> | 155.3 (3)  |
| F6—Sb1—Rb2                                | 34.6 (2)  | O1—Sb1—Rb2 <sup>iii</sup>             | 76.0 (2)   |
| F6—Sb1—Rb2 <sup>i</sup>                   | 62.6 (3)  | O1 <sup>i</sup> —Rb1—F3 <sup>xi</sup> | 152.3 (3)  |
| F1—Sb2—O2 <sup>iv</sup>                   | 81.9 (4)  | F4 <sup>x</sup> —Rb1—O3 <sup>i</sup>  | 118.0 (3)  |
| F3—Sb2—O2 <sup>iv</sup>                   | 148.4 (4) | O1 <sup>i</sup> —Rb1—O3 <sup>i</sup>  | 46.4 (3)   |
| F2—Sb2—O2 <sup>iv</sup>                   | 72.6 (4)  | F2 <sup>xi</sup> —Rb1—O3 <sup>i</sup> | 157.0 (3)  |
| F1—Sb2—O3 <sup>i</sup>                    | 160.9 (4) | F1 <sup>xi</sup> —Rb1—O3 <sup>i</sup> | 139.7 (3)  |
| F3—Sb2—O3 <sup>i</sup>                    | 88.0 (5)  | F5 <sup>x</sup> —Rb1—O3 <sup>i</sup>  | 93.4 (3)   |
| F4 <sup>vi</sup> —Rb2—O4 <sup>iii</sup>   | 169.0 (3) | O3—S1—Rb2                             | 148.8 (6)  |
| F6 <sup>viii</sup> —Rb2—O4 <sup>iii</sup> | 53.6 (2)  | O4—S1—Rb2                             | 45.7 (5)   |
| O1—S1—O2                                  | 117.6 (8) | O1—S1—O4                              | 109.4 (6)  |
| O1—S1—O3                                  | 109.4 (6) | O2—S1—O4                              | 107.2 (6)  |
| O2—S1—O3                                  | 108.5 (5) | O3—S1—O4                              | 103.8 (8)  |

Symmetry codes: (i)  $x, y+1, z$ ; (ii)  $-x, y-1/2, -z+1$ ; (iii)  $-x+1, y+1/2, -z+1$ ; (iv)  $-x+1, y+1/2, -z+2$ ; (v)  $-x, y-1/2, -z+2$ ; (vi)  $x, y-1, z$ ; (vii)  $x, y, z-1$ ; (viii)  $-x+1, y-1/2, -z+1$ ; (ix)  $x, y-1, z-1$ ; (x)  $-x, y+1/2, -z+1$ ; (xi)  $-x, y+1/2, -z+2$ ; (xii)  $x, y, z+1$ ; (xiii)  $x, y+1, z+1$ ; (xiv)  $-x+1, y-1/2, -z+2$ .

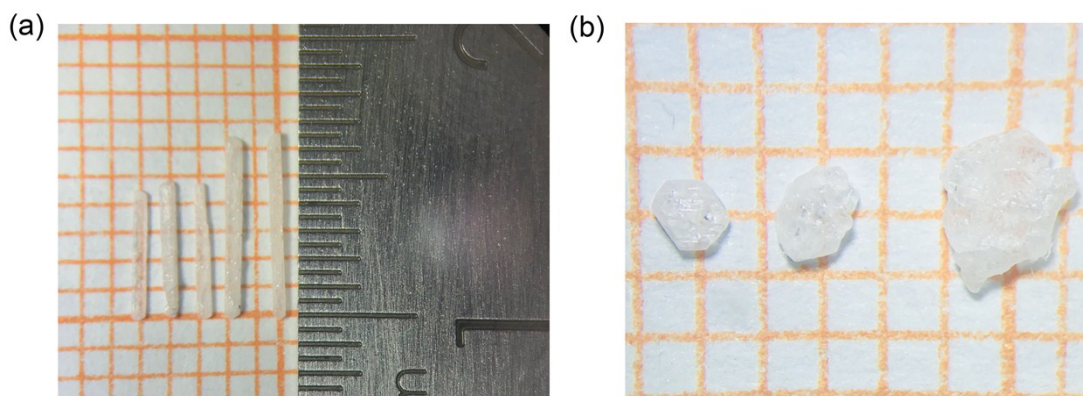

**Fig. S1.** Crystal photographs of compounds (a)  $\text{K}_2\text{SO}_4 \cdot (\text{SbF}_3)_2$  and (b)  $\text{Rb}_2\text{SO}_4 \cdot (\text{SbF}_3)_2$ .

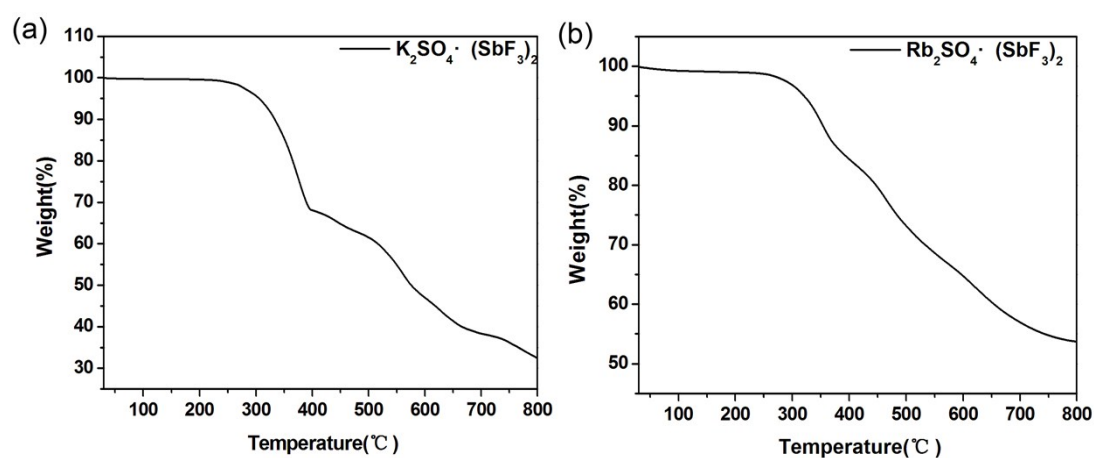

**Fig. S2.** TGA curves of compounds (a)  $\text{K}_2\text{SO}_4 \cdot (\text{SbF}_3)_2$  and (b)  $\text{Rb}_2\text{SO}_4 \cdot (\text{SbF}_3)_2$ .

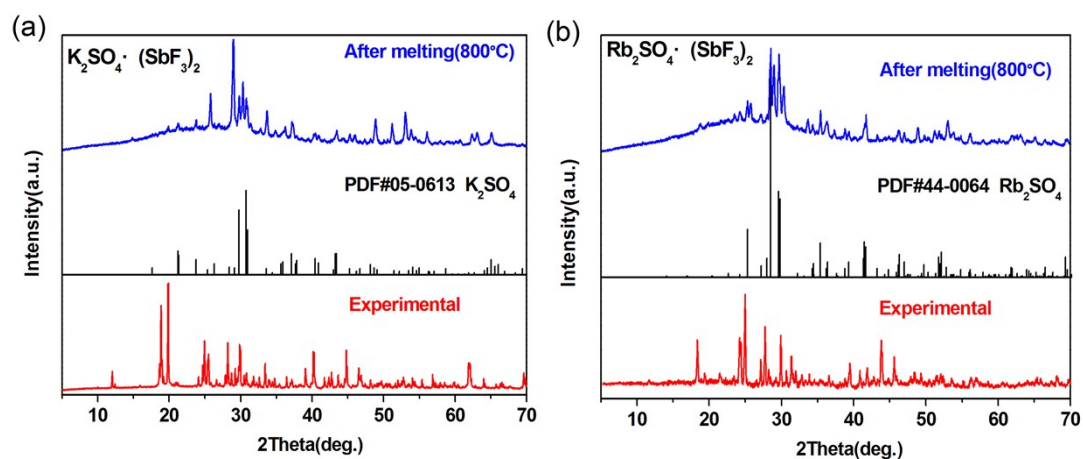

**Fig. S3.** Experimental XRD patterns for compounds (a)  $\text{K}_2\text{SO}_4 \cdot (\text{SbF}_3)_2$  and (b)  $\text{Rb}_2\text{SO}_4 \cdot (\text{SbF}_3)_2$  before and after melting.



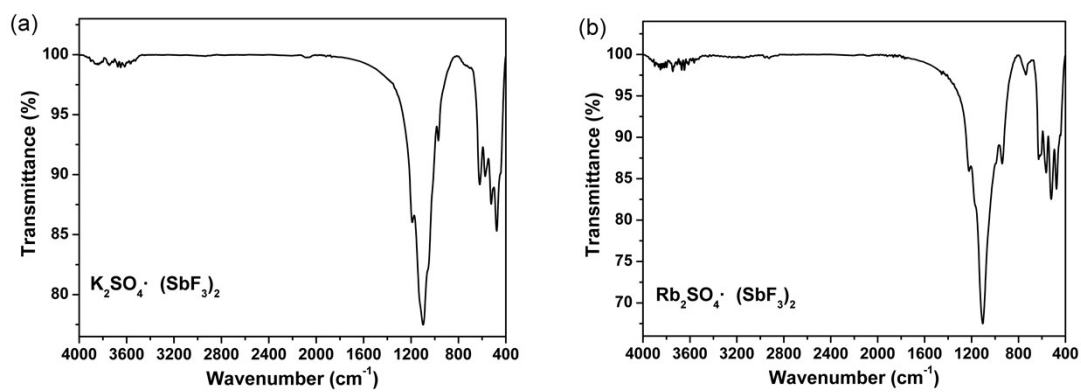

**Fig. S4.** The IR spectra of compounds (a)  $\text{K}_2\text{SO}_4 \cdot (\text{SbF}_3)_2$  and (b)  $\text{Rb}_2\text{SO}_4 \cdot (\text{SbF}_3)_2$ .

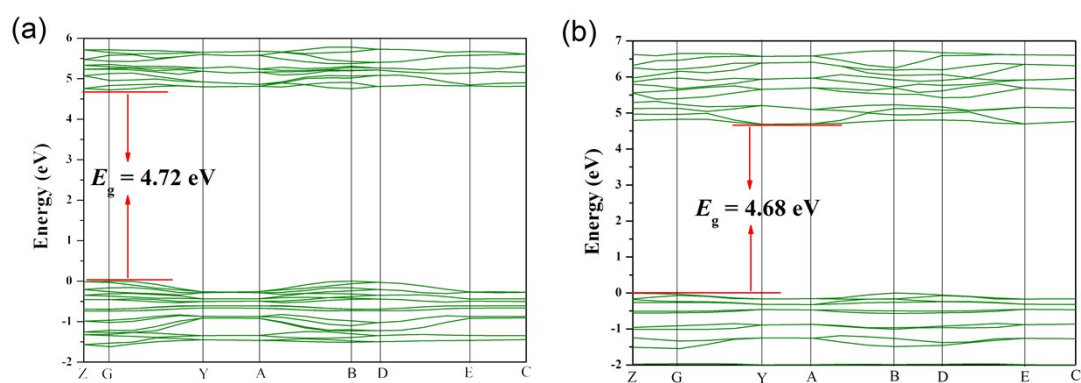

**Fig. S5.** Calculated band structures of (a)  $\text{K}_2\text{SO}_4 \cdot (\text{SbF}_3)_2$  and (b)  $\text{Rb}_2\text{SO}_4 \cdot (\text{SbF}_3)_2$ .
